# Supplementary material for: The nature of the human T cell response to the cancer antigen 5T4 is determined by the balance of regulatory and inflammatory T cells of the same antigen-specificity: implications for vaccine design
Source: Springer Nature journal article supplement (doi:10.1007/s00262-018-2266-1), 2018-11-07
Supplement: MOESM1 [file 16256730]

**Cancer Immunology, Immunotherapy – Matthieu Besneux et al.**

| No. | Sequence              | No. | Sequence              | No. | Sequence             |
|-----|-----------------------|-----|-----------------------|-----|----------------------|
| 1   | MPGGCSRGAAGDGRRLRLAR  | 15  | LPSLRQLDLSHNPLADLSPF  | 29  | LQGLPHIRVFLDNNPWVDCD |
| 2   | AGDGRRLRLARLALVLLGWVS | 16  | HNPLADLSPFAFSGSNASVS  | 30  | LDNNPWVCDCHMADMVTWLK |
| 3   | LALVLLGWVSSSSPTSSASS  | 17  | AFSGSNASVSAPSPLVELIL  | 31  | HMADMVTWLKETEVVQGKDR |
| 4   | SSSPTSSASSFSSSAPFLAS  | 18  | APSPLVELILNHIVPPEDER  | 32  | ETEVVQGKDRLTCAYPEKMR |
| 5   | FSSSAPFLASAVSAQPPLPD  | 19  | NHIVPPEDERQNRSFEGMVV  | 33  | LTCAYPEKMRNRVLELNSA  |
| 6   | AVSAQPPLPDQCPALCECSE  | 20  | QNRSFEGMVVAALLAGRALQ  | 34  | NRVLELNSADLDCDPILPP  |
| 7   | QCPALCECSEAARTVKCVNR  | 21  | AALLAGRALQGLRRLELASN  | 35  | DLDCDPILPPSLQTSYVFLG |
| 8   | AARTVKCVNRNLTEVPTDLP  | 22  | GLRRLELASNHFLYLPRDVL  | 36  | SLQTSYVFLGIVLALIGAIF |
| 9   | NLTEVPTDLPAYVRNLFLTG  | 23  | HFLYLPRDVLAQLPSLRHLD  | 37  | IVLALIGAIFLLVLYLNRKG |
| 10  | AYVRNLFLTGNQLAVLPAGA  | 24  | AQLPSLRHLDLSNNSLVSLT  | 38  | LLVLYLNRKGIKKWMHNIRD |
| 11  | NQLAVLPAGAFARRPPLAEL  | 25  | LSNNSLVSLTYVSFRNLTHL  | 39  | IKKWMHNIRDACRDHMEGYH |
| 12  | FARRPPLAELAALNLSGSRL  | 26  | YVSFRNLTHLES LHLEDNAL | 40  | ACRDHMEGYHYRYEINADPR |
| 13  | AALNLSGSRLDEVVRAGAFEH | 27  | ESLHLEDNALKVLHNGTLAE  | 41  | YRYEINADPRLTNLSSNSDV |
| 14  | DEVVRAGAFEHLPSLRQLDLS | 28  | KVLHNGTLAELQGLPHIRVF  |     |                      |

**Supplementary Table 1** 5T4 peptide sequences. Forty-one 20mer peptides, overlapping by 10 amino acids, were synthesised to >95% purity to span the entire 5T4 sequence

|     | Immunogenicity |     | Origin                 | Sequence             | Domain origin                |
|-----|----------------|-----|------------------------|----------------------|------------------------------|
| p2  | HD             | CRC | 5T4 <sub>11-30</sub>   | AGDGRLRLARLALVLLGWVS | Signal peptide               |
| p3  |                | CRC | 5T4 <sub>21-40</sub>   | LALVLLGWVSSSSPTSSASS | Signal peptide/Extracellular |
| p12 | HD             |     | 5T4 <sub>111-130</sub> | FARRPPLAELAALNLSGSRL | Extracellular LRR 1-2        |
| p20 | HD             | CRC | 5T4 <sub>191-210</sub> | QNSRFEGMVVAALLAGRALQ | Extracellular LRR 4-5        |
| p26 | HD             |     | 5T4 <sub>251-270</sub> | YVSFRNLTHLESLHLEDNAL | Extracellular LRR 6-7        |
| p28 |                | CRC | 5T4 <sub>271-290</sub> | KVLHNGTLAELQGLPHIRVF | Extracellular LRR 7-LRRCT    |
| p38 | HD             | CRC | 5T4 <sub>371-390</sub> | LLVLYLNRKGIKKWMHNIRD | Transmembrane/Intracellular  |

**Supplementary Table 2** Further details of peptides identified as immunogenic from the 5T4 protein

|              |          | Peptides                                    |          |            |            |            |           |            |          |           |           |            |           |
|--------------|----------|---------------------------------------------|----------|------------|------------|------------|-----------|------------|----------|-----------|-----------|------------|-----------|
|              |          | 3                                           |          | 10         |            | 15         |           | 24         |          | 28        |           |            |           |
|              |          | Treg replete (+) or following Depletion (-) |          |            |            |            |           |            |          |           |           |            |           |
|              |          | DR1+                                        |          | +          | -          | +          | -         | +          | -        | +         | -         | +          | -         |
| CRC Patients | HLA-DRB1 | MB30                                        | *01, *13 | 0          | 0          | 0          | 0         | <u>139</u> | <i>0</i> | 0         | 0         | 0          | <i>28</i> |
|              |          | MB51                                        | *01, *03 | 1          | 0          | 11         | 0         | 0          | 0        | 0         | 0         | 0          | 0         |
|              |          | MB65                                        | *01, -   | <u>40</u>  | <u>160</u> | <u>48</u>  | <i>0</i>  |            |          | 1         | <i>81</i> | 1          | 1         |
|              |          |                                             | DR15+    |            |            |            |           |            |          |           |           |            |           |
|              |          | MB26                                        | *15, *04 | 24         | 4          |            |           | <u>289</u> | <i>4</i> |           |           | <u>123</u> | <i>8</i>  |
|              |          | MB64                                        | *15, -   | 3          | 7          | 3          | 0         |            |          | 1         | 3         | <u>32</u>  | <i>1</i>  |
|              |          | MB66                                        | *04, *15 | <u>67</u>  | <u>148</u> | <u>140</u> | <i>11</i> |            |          | <u>37</u> | <i>1</i>  | 8          | 13        |
|              |          | MB49                                        | *03, *15 | <u>85</u>  | <i>0</i>   | 0          | 0         | 0          | 0        | 0         | 0         | 0          | 0         |
|              |          |                                             | DR3+     |            |            |            |           |            |          |           |           |            |           |
|              |          | MB29                                        | *03, *04 | <u>247</u> | <u>33</u>  | 11         | <i>37</i> |            |          | <u>43</u> | <i>0</i>  | <u>268</u> | <i>5</i>  |
|              |          | MB41                                        | *03, *04 | 0          | 0          | 0          | 0         | 0          | 0        | 0         | 0         | 0          | 0         |
|              |          | MB48                                        | *03, *13 | 0          | 0          | 0          | 0         | 0          | 0        | 0         | 0         | 0          | 0         |
|              |          | MB49                                        | *03, *15 | <u>85</u>  | <i>0</i>   | 0          | 0         | 0          | 0        | 0         | 0         | 0          | 0         |
|              |          | MB51                                        | *01, *03 | 1          | 0          | 11         | 0         | 0          | 0        | 0         | 0         | 0          | 0         |
|              |          | MB62                                        | *03, -   | 3          | 1          | 0          | <i>29</i> |            |          |           |           | 5          | 3         |
|              |          |                                             | DR4+     |            |            |            |           |            |          |           |           |            |           |
|              |          | MB26                                        | *15, *04 | 24         | 4          |            |           | <u>289</u> | <i>4</i> |           |           | <u>123</u> | <i>8</i>  |
|              |          | MB28                                        | *04, *07 | 1          | 0          | 3          | 1         |            |          | 0         | 0         | 7          | 0         |
|              |          | MB46                                        | *04, *13 | 0          | 0          | 0          | 0         | 0          | 0        | 0         | 0         | 0          | 0         |
|              |          | MB66                                        | *04, *15 | <u>67</u>  | <u>148</u> | <u>140</u> | <i>11</i> |            |          | <u>37</u> | <i>1</i>  | 8          | 13        |
|              |          | MB29                                        | *03, *04 | <u>247</u> | <u>33</u>  | 11         | <i>37</i> |            |          | <u>43</u> | <i>0</i>  | <u>268</u> | <i>5</i>  |
|              |          | MB41                                        | *03, *04 | 0          | 0          | 0          | 0         | 0          | 0        | 0         | 0         | 0          | 0         |
|              |          |                                             | DR13+    |            |            |            |           |            |          |           |           |            |           |
|              |          | MB30                                        | *01, *13 | 0          | 0          | 0          | 0         | <u>139</u> | 0        | 0         | 0         | 0          | <i>28</i> |
|              |          | MB48                                        | *03, *13 | 0          | 0          | 0          | 0         | 0          | 0        | 0         | 0         | 0          | 0         |
|              |          | MB46                                        | *04, *13 | 0          | 0          | 0          | 0         | 0          | 0        | 0         | 0         | 0          | 0         |
|              |          |                                             | Other DR |            |            |            |           |            |          |           |           |            |           |
|              |          | MB27                                        | *08, *14 | 13         | <i>264</i> |            |           | 1          | 0        |           |           | <u>377</u> | <i>12</i> |

**Supplementary Table 3** Response changes upon Treg depletion, stratified by donor HLA-type.

Peptides are listed at the top. The numbers represent the spot-forming cells /10<sup>5</sup> cultured PBMC after subtraction of background spots, in the presence (+ sign) or absence (- sign) of CD25<sup>hi</sup> cells.

Underlined numbers indicate positive responses. **Blue** numbers indicate an increase of at least 50% in depleted cells, **red** new responses and *italic* a decrease, compared to replete cells

|                                |                      | HLA-DRB          |                  |                  |                  |                  |                                       |                                       |
|--------------------------------|----------------------|------------------|------------------|------------------|------------------|------------------|---------------------------------------|---------------------------------------|
|                                |                      | *0101            | *0301            | *0401            | *0701            | *1302            | *1501                                 | 20mer                                 |
| Strongest Predicted Core 9-mer | Peptide-2            | <b>LRLARLALV</b> | <b>LRLARLALV</b> | <b>LRLARLALV</b> | <b>LRLARLALV</b> | <b>LRLARLALV</b> | <b>LRLARLALV</b>                      | AGDGR <b><u>LRLARLALV</u></b> LLGWVS  |
|                                | <i>Affinity (nM)</i> | 57               | 1162             | 771              | 182              | 154              | 158                                   |                                       |
|                                | Peptide-12           | <b>LAELAALNL</b> | AALNLSGSR        | LAALNLSGS        | <b>LAELAALNL</b> | AALNLSGSR        | <b>LAELAALNL</b>                      | FARRPPI <b><u>LAELAALNL</u></b> SGSRL |
|                                | <i>Affinity (nM)</i> | 175              | 5508             | 1338             | 807              | 1114             | 765                                   |                                       |
|                                | Peptide-20           | <b>VAALLAGRA</b> | VVAALLAGR        | FEGMVVAAL        | FEGMVVAAL        | <b>VAALLAGRA</b> | <b>VAALLAGRA</b>                      | QNRSFEGMV <b><u>VAALLAGRA</u></b> LQ  |
|                                | <i>Affinity (nM)</i> | 60               | 3901             | 914              | 356              | 1475             | 264                                   |                                       |
| Peptide-26                     | <b>LTHLESLHL</b>     | <b>LTHLESLHL</b> | <b>LTHLESLHL</b> | <b>LTHLESLHL</b> | <b>LTHLESLHL</b> | <b>LTHLESLHL</b> | YVSFRNL <b><u>LTHLESLHL</u></b> EDNAL |                                       |
| <i>Affinity (nM)</i>           | 68                   | 3774             | 381              | 214              | 827              | 129              |                                       |                                       |
| Peptide-38                     | <b>LVLYLNRKG</b>     | <b>LYLNRKGIK</b> | <b>LVLYLNRKG</b> | <b>LVLYLNRKG</b> | <b>LYLNRKGIK</b> | <b>LVLYLNRKG</b> | LL <b><u>LVLYLNRKGIK</u></b> KWMHNIRD |                                       |
| <i>Affinity (nM)</i>           | 421                  | 944              | 1837             | 1183             | 431              | 119              |                                       |                                       |

**Supplementary Table 4** Prediction of the strongest binding core from the five most immunogenic 20mer peptides (2, 12, 20, 26 and 38) using the NetMHCII pan 3.2 prediction tool (updated 2018, reference [1] ). The strongest predicted core and corresponding affinity prediction in nanomolar (nM) are shown for each 20mer peptide and HLA-DRB1 allele. The dominant core from each 20mer across all alleles is in bold text and underlined within the parent peptide in the far-right column

| <b>HLA-DRB1</b> | <b>Representation</b>  |                       |
|-----------------|------------------------|-----------------------|
|                 | <b>Cancer Patients</b> | <b>Healthy Donors</b> |
| <b>*01</b>      | 24%                    | 33%                   |
| <b>*03</b>      | 17%                    | 27%                   |
| <b>*04</b>      | 48%                    | 27%                   |
| <b>*07</b>      | 21%                    | 47%                   |
| <b>*13</b>      | 21%                    | 7%                    |
| <b>*15</b>      | 34%                    | 33%                   |

**Supplementary Table 5** HLA-DRB1 allele representation across patients and healthy donors used to create DR specific heatmaps



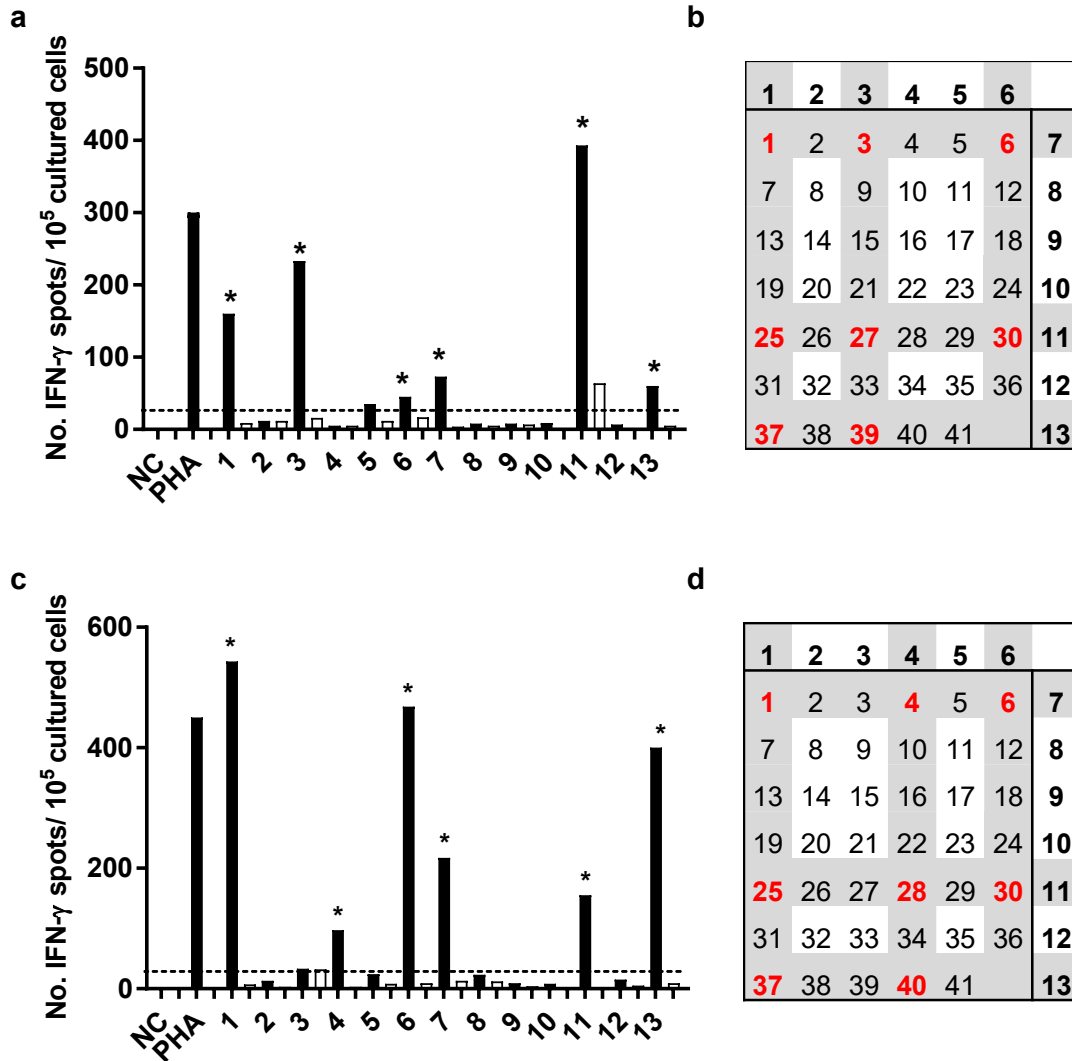

**Supplementary Fig.2** Determining candidate 5T4 peptides using a peptide matrix. After 12 days of stimulation, specific responses were measured in an IFN- $\gamma$  ELISpot assay, data shown for two patients (a) and (c). The matrix allows for the rapid identification of putative peptides (highlighted in red). Two representative examples are given with CRC patients (a), (b) MB3 and (c), (d) MB12





d

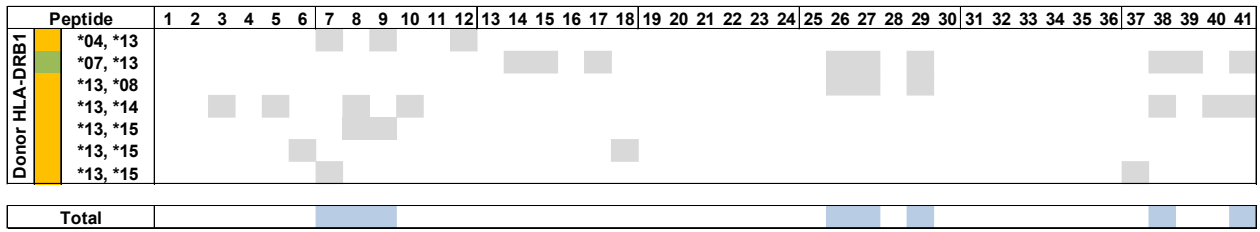

e

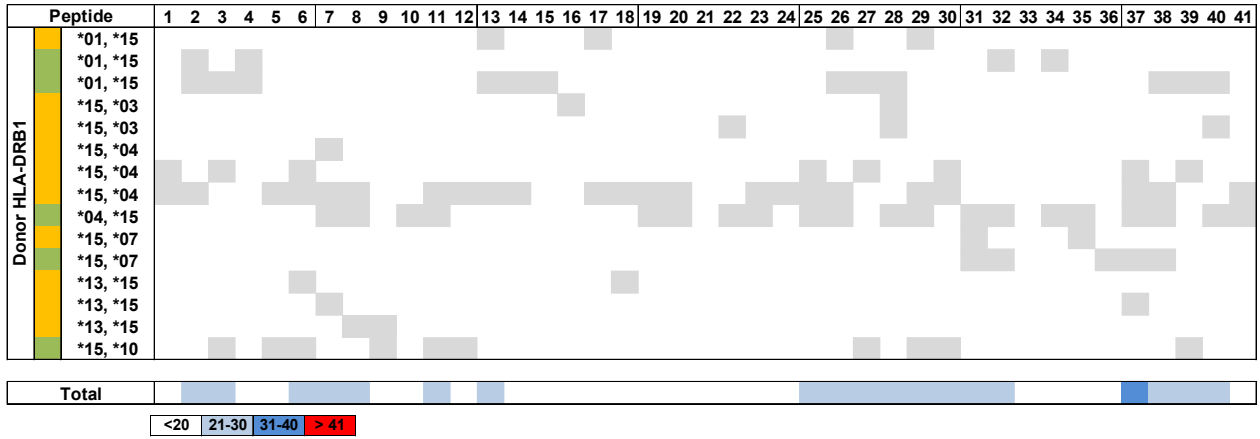

**Supplementary Fig.3** Heatmaps of responses stratified by each HLA-DRB1 group. HLA-DRB1\*01 was shown in Fig.1d. Grouped by HLA-DRB1 alleles: (a) HLA-DRB1\*03, (b) HLA-DRB1\*04, (c) HLA-DRB1\*07, (d) HLA-DRB1\*13, (e) HLA-DRB1\*15. Donor status is indicated by the orange or green box on the far left of each heatmap. Healthy in green and cancer in orange

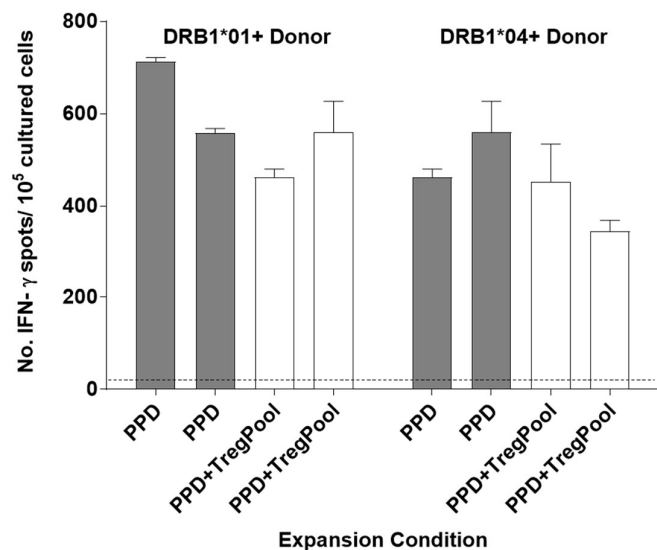

**Supplementary Fig.4** PPD responses in the presence or absence of the Treg pool. Two healthy donors, one HLA-DRB1\*01<sup>+</sup> and HLA-DRB1\*04<sup>+</sup> are shown. Four separate PBMC lines per donor were raised to the control antigen PPD, two in the presence of a Treg pool (PPD+TregPool). Lines were re-stimulated with PPD in duplicate on IFN- $\gamma$  ELISpot, and background subtracted as previously shown

### Supplementary references

1. Jensen KK, Andreatta M, Marcatili P, et al (2018) Improved methods for predicting peptide binding affinity to MHC class II molecules. *Immunology* 154:394–406 . doi: 10.1111/imm.12889
2. Nielsen M, Lund O (2009) NN-align. An artificial neural network-based alignment algorithm for MHC class II peptide binding prediction. *BMC Bioinformatics* 10:296 . doi: 10.1186/1471-2105-10-296
3. Vita R, Overton JA, Greenbaum JA, et al (2015) The immune epitope database (IEDB) 3.0. *Nucleic Acids Res* 43:D405–D412 . doi: 10.1093/nar/gku938
